# Supplementary material for: Plant Products Affect Growth and Digestive Efficiency of Cultured Florida Pompano (Trachinotus carolinus) Fed Compounded Diets
Source: PLOS journal article supplement (doi:10.1371/journal.pone.0034981), 2012-04-20
Supplement: S1 (10.1371/journal.pone.0034981.s001) [file journal.pone.0034981.s001]

**Table S1. Reported apparent crude protein digestibility (ACPD) and apparent energy digestibility (AED) of canola meal (CM), corn gluten meal (CGM), and distillers dried grains with solubles (DDGS) among various fish species.**

| Ingredient | Species         | ACPD | AED   | Source                                 |
|------------|-----------------|------|-------|----------------------------------------|
| CM         |                 |      |       |                                        |
|            | Florida pompano | 38.6 | 21.3  | Current study <sup>3</sup>             |
|            | Atlantic cod    | 76.0 | 60.6  | Tibbetts et al. [51] <sup>3</sup>      |
|            | Atlantic salmon | 74.1 |       | Anderson et al. [53]                   |
|            | Chinook salmon  | 84.5 | 64.5  | Hajen et al. [54]                      |
|            |                 | 79.0 |       | NRC [55]                               |
|            | Cobia           | 89.0 | 83.1  | Zhou et al. [52] <sup>3</sup>          |
|            | Haddock         | 83.0 | 60.1  | Tibbetts et al. [50] <sup>3</sup>      |
|            | Rainbow trout   | 90.9 | 76.4  | Burel et al. [48]                      |
|            | Red seabream    | 83.0 | 44.0  | Glencross et al. [20] <sup>3</sup>     |
|            | Silver perch    | 83.0 | 58.1  | Allan et al. [56]                      |
|            | Turbot          | 82.9 | 69.3  | Burel et al. [48] <sup>3</sup>         |
| CGM        |                 |      |       |                                        |
|            | Florida pompano | 57.2 | 57.1  | Current study <sup>3</sup>             |
|            |                 | 81.9 | 77.4  | Riche and Williams [33] <sup>1,3</sup> |
|            |                 | 83.4 | 77.4  | Riche and Williams [33] <sup>2,3</sup> |
|            | Atlantic cod    | 86.3 | 82.7  | Tibbetts et al. [51] <sup>3</sup>      |
|            | Atlantic salmon | 83.1 |       | Anderson et al. [53]                   |
|            | Cobia           | 94.4 | 94.2  | Zhou et al. [52] <sup>3</sup>          |
|            | Haddock         | 92.3 | 80.7  | Tibbetts et al. [50] <sup>3</sup>      |
|            | Rainbow trout   | 87.0 |       | NRC [55]                               |
|            |                 | 91.0 |       | Halver and Hardy [57]                  |
|            |                 | 97.3 |       | Sugiura et al. [58]                    |
|            |                 | 87.4 | 80.0  | Cheng and Hardy [47]                   |
|            | Rockfish        | 92.0 | 89.0  | Lee [49] <sup>3</sup>                  |
|            | Silver perch    | 95.4 | 104.5 | Allan et al. [56]                      |
| DDGS       |                 |      |       |                                        |
|            | Florida pompano | 20.6 | 30.7  | Current study                          |
|            |                 | 54.0 | 63.5  | Williams [29] <sup>1</sup>             |
|            |                 | 60.5 | 66.2  | Williams [29] <sup>2</sup>             |
|            | Rainbow trout   | 85.0 | 51.0  | Cho and Kaushik [59]                   |
|            |                 | 72.0 |       | Halver and Hardy [57]                  |
|            |                 | 90.4 |       | Cheng and Hardy [60]                   |

<sup>1</sup>Salinity, 3 g/L.

<sup>2</sup>Salinity, 28 g/L.

<sup>3</sup>Reports used in Figure 2.
